# Supplementary material for: Stable micelles formed through a stereocomplex of amphiphilic copolymers zwitterionic-(PLLA)2and MPEG-(PDLA)2for controlled drug delivery
Source: Royal Society of Chemistry journal article supplement (doi:10.1039/c6ra10825c), 2016-01-01
Supplement: c6ra10825c1.pdf [file c6ra10825c1.pdf]

**Stable micelles formed through stereocomplex of amphiphilic copolymers  
zwitterionic-(PLLA)<sub>2</sub> and MPEG-(PDLA)<sub>2</sub> for controlled drug delivery**

**Shasha Zhao, Xiaoshan Fan, Xiaoyan Li, Xianglin Lv, Weiwei Zhang, Zhiguo Hu\***

*Collaborative Innovation Center of Henan Province for Green Manufacturing of Fine Chemicals, Key  
Laboratory of Green Chemical Media and Reactions, Ministry of Education, Henan Engineering Laboratory  
of Chemical Pharmaceuticals & Biomedical Materials, School of Chemistry and Chemical Engineering,  
Henan Normal University, P. R. China.*

*E-mails: Zhiguo Hu (E-mail: zghu@htu.cn, Tel: +86-373-3326335).*

**Table of contents**

|                                                     |           |
|-----------------------------------------------------|-----------|
| <b>I. DLS spectra for the stereocomplexes.....</b>  | <b>S2</b> |
| <b>II. TEM spectra for the stereocomplexes.....</b> | <b>S2</b> |

## I. DLS spectra for the stereocomplexes

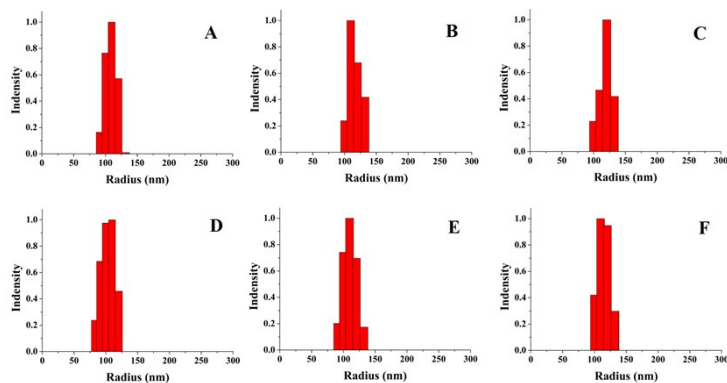

SI Fig. 1. DLS Spectra of zwitterionic-(PLLA<sub>2.5K</sub>)<sub>2</sub>/MPEG<sub>1.9K</sub>-(PDLA<sub>2.5K</sub>)<sub>2</sub> micelles at (A) 1d; (B) 3d; (C) 5d; (D) 7d; (E) 11d; (F) 15d;

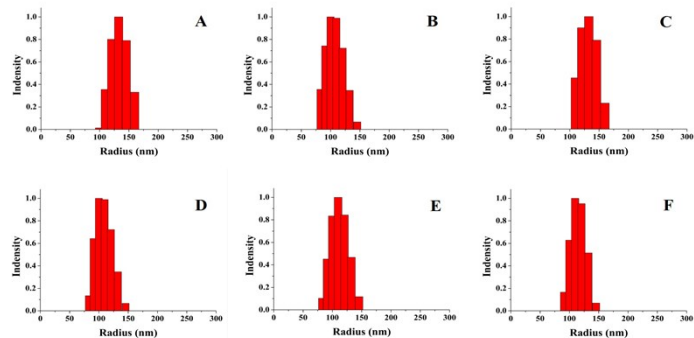

SI Fig. 2. DLS Spectra of zwitterionic-(PLLA<sub>2.5K</sub>)<sub>2</sub>/MPEG<sub>5K</sub>-(PDLA<sub>2.5K</sub>)<sub>2</sub> micelles at (A) 1d; (B) 3d; (C) 5d; (D) 7d; (E) 11d; (F) 15d;

## II. TEM spectra for the stereocomplexes

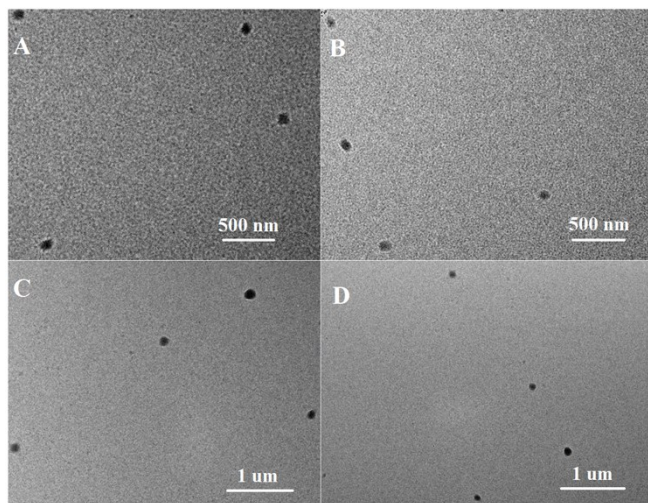

SI Fig. 3. TEM spectra of zwitterionic-(PLLA<sub>2.5K</sub>)<sub>2</sub>/MPEG<sub>1.9K</sub>-(PDLA<sub>2.5K</sub>)<sub>2</sub> micelles at (A) 1d; (B) 15d; and zwitterionic-(PLLA<sub>2.5K</sub>)<sub>2</sub>/MPEG<sub>5K</sub>-(PDLA<sub>2.5K</sub>)<sub>2</sub> micelles at (C) 1d; (D) 15d
